# Supplementary material for: Studying the Geroprotective Properties of YAP/TAZ Signaling Inhibitors on Drosophila melanogaster Model
Source: Preprints.org preprint supplement (doi:10.20944/preprints202212.0250.v1), 2022-12-14
Supplement: Supplementary file 2 [file supplementary]

**Table S3.** Two-way ANOVA of age-related changes in the expression level of Yki target genes in male and female flies.

| Sex | Source of variation | SS      | DF  | MS     | F      | p      |
|-----|---------------------|---------|-----|--------|--------|--------|
| ♂   | Gene                | 4066.12 | 7   | 580.87 | 403.97 | 0.0000 |
|     | Age                 | 5.86    | 1   | 5.86   | 4.07   | 0.0440 |
|     | Gene $\times$ Age   | 38.66   | 7   | 5.52   | 3.84   | 0.0004 |
|     | Error               | 795.16  | 553 | 1.44   |        |        |
| ♀   | Gene                | 2253.38 | 7   | 321.91 | 400.85 | 0.0000 |
|     | Age                 | 9.75    | 1   | 9.75   | 12.14  | 0.0005 |
|     | Gene $\times$ Age   | 69.69   | 7   | 9.96   | 12.40  | 0.0000 |
|     | Error               | 448.92  | 559 | 0.80   |        |        |

♂ – male; ♀ – female; SS – sum-of-squares; DF – degrees of freedom; MS – mean squares. Results of F-tests: F – F-value and p – p-value.
