# Supplementary material for: Studying the Geroprotective Properties of YAP/TAZ Signaling Inhibitors on Drosophila melanogaster Model
Source: Preprints.org preprint supplement (doi:10.20944/preprints202212.0250.v1), 2022-12-14
Supplement: Supplementary file 5 [file supplementary]

**Table S11.** Effects of treatment with YAP/TAZ inhibitors on the lifespan of male and female flies. The results from 2 independent experiments are pooled.

| Inhibitor | Sex | C ( $\mu$ M) | M (days) | dM (%) | FET (M) |       | 90% (days) | d90% (%) | FET (90%) |        | FHT (Early) |        | FHT (Late) |        | N   |
|-----------|-----|--------------|----------|--------|---------|-------|------------|----------|-----------|--------|-------------|--------|------------|--------|-----|
|           |     |              |          |        | p       | pB    |            |          | p         | pB     | p           | pB     | p          | pB     |     |
| VP        | ♂   | 0 (control)  | 36       | n/a    | n/a     | n/a   | 41         | n/a      | n/a       | n/a    | n/a         | n/a    | n/a        | n/a    | 287 |
|           |     | 0.01         | 36       | 0      | 0.007   | 0.014 | 42         | +2       | 0         | 0      | 0.0079      | 0.0158 | 0.0002     | 0.0005 | 306 |
|           |     | 0.1          | 36       | 0      | 0.007   | 0.014 | 42         | +2       | 0         | 0      | 0.0002      | 0.0004 | 0          | 0      | 293 |
| ML        | ♂   | 0 (control)  | 35       | n/a    | n/a     | n/a   | 40         | n/a      | n/a       | n/a    | n/a         | n/a    | n/a        | n/a    | 290 |
|           |     | 0.1          | 36       | +3     | 0.6     | 1     | 40         | 0        | 0         | 0.0002 | 0.503       | 1      | 0.444      | 0.888  | 277 |
|           |     | 1            | 36       | +3     | 0.4     | 0.8   | 40         | 0        | 0.2       | 0.4    | 0.551       | 1      | 0.0015     | 0.003  | 299 |
| CD        | ♂   | 0 (control)  | 34       | n/a    | n/a     | n/a   | 40         | n/a      | n/a       | n/a    | n/a         | n/a    | n/a        | n/a    | 290 |
|           |     | 0.1          | 35       | +3     | 0.006   | 0.012 | 41         | +3       | 0.042     | 0.084  | 0.0001      | 0.0001 | 0.0001     | 0.0003 | 324 |
|           |     | 1            | 35       | +3     | 0.029   | 0.058 | 41         | +3       | 0.001     | 0.002  | 0.0012      | 0.0023 | 0.0002     | 0.0004 | 303 |
| AI        | ♂   | 0 (control)  | 36       | n/a    | n/a     | n/a   | 40         | n/a      | n/a       | n/a    | n/a         | n/a    | n/a        | n/a    | 293 |
|           |     | 0.1          | 37       | +3     | 0.2     | 0.4   | 41         | +3       | 0.01      | 0.02   | 0.0004      | 0.0007 | 0          | 0      | 321 |
|           |     | 1            | 37       | +3     | 0.4     | 0.8   | 41         | +3       | 0.03      | 0.06   | 0.0007      | 0.0015 | 0          | 0      | 293 |
| VP        | ♀   | 0 (control)  | 36       | n/a    | n/a     | n/a   | 41         | n/a      | n/a       | n/a    | n/a         | n/a    | n/a        | n/a    | 282 |
|           |     | 0.01         | 36       | 0      | 0.6     | 1     | 40         | -3       | 0.3       | 0.6    | 0.9501      | 1      | 0.0832     | 0.1665 | 305 |
|           |     | 0.1          | 36       | 0      | 0.2     | 1     | 41         | 0        | 0.0008    | 0.0016 | 0.3839      | 0.7679 | 0.1785     | 0.357  | 281 |
| ML        | ♀   | 0 (control)  | 35       | n/a    | n/a     | n/a   | 40         | n/a      | n/a       | n/a    | n/a         | n/a    | n/a        | n/a    | 300 |
|           |     | 0.1          | 34       | +3     | 0.2     | 0.4   | 40         | 0        | 0.009     | 0.018  | 0.39        | 0.789  | 0.0212     | 0.0424 | 274 |
|           |     | 1            | 35       | 0      | 0.1     | 0.2   | 40         | 0        | 0.05      | 0.1    | 0.15        | 0.3    | 0.0167     | 0.0335 | 283 |
| CD        | ♀   | 0 (control)  | 35       | n/a    | n/a     | n/a   | 40         | n/a      | n/a       | n/a    | n/a         | n/a    | n/a        | n/a    | 292 |
|           |     | 0.1          | 34       | -3     | 0.04    | 0.08  | 40         | 0        | 0.34      | 0.64   | 0.004       | 0.007  | 0.2285     | 0.4569 | 293 |
|           |     | 1            | 35       | 0      | 0.8     | 1     | 40         | 0        | 1         | 1      | 0.46        | 0.92   | 0.5862     | 1      | 330 |
| AI        | ♀   | 0 (control)  | 35       | n/a    | n/a     | n/a   | 40         | n/a      | n/a       | n/a    | n/a         | n/a    | n/a        | n/a    | 323 |
|           |     | 0.1          | 34       | +3     | 0.001   | 0.002 | 37         | -8       | 1         | 1      | 0.087       | 0.17   | 0.0999     | 0.1998 | 310 |
|           |     | 1            | 37       | +6     | 0       | 0     | 40         | 0        | 0.0001    | 0.0002 | 0           | 0      | 0          | 0      | 330 |

VP – Verteporfin; ML7 – ML-7 hydrochloride; CD – Cytochalasin D; AI – AICAR; ♂ – male; ♀ – female; Rep. – Replication; C ( $\mu$ M) – Concentration ( $\mu$ M); M (days) – median lifespan; 90% (days) – maximum lifespan (age of 90% mortality); dM, d90% – differences between median and maximum lifespan of the control and experimental flies, respectively; p – p-value; pB – Bonferroni-corrected p-value; FET (M) and FET (90%) – Fisher's Exact Test for median and maximum lifespan, respectively; FHT (Early) and FHT (Late) – Fleming-Harrington test sensitive against early and later differences in deaths, respectively; n/a – not applicable; N – number of flies.
