# Supplementary material for: Studying the Geroprotective Properties of YAP/TAZ Signaling Inhibitors on Drosophila melanogaster Model
Source: Preprints.org preprint supplement (doi:10.20944/preprints202212.0250.v1), 2022-12-14
Supplement: Supplementary file 6 [file supplementary]

**Table S1.** List of primers.

| Gene                                                 | Symbol<br>(FlyBase) | Forward/Reverse (5'-3')                               |
|------------------------------------------------------|---------------------|-------------------------------------------------------|
| <i>β-Tubulin at 56D</i>                              | <i>β-Tubulin</i>    | GCAACTCCACTGCCATCC/<br>CCTGCTCCTCCTCGAACT             |
| <i>Ribosomal protein L32</i>                         | <i>RpL32</i>        | GAAGCGCACCAAGCACTTCATC/<br>CGCCATTTGTGCGACAGCTTAG     |
| <i>Cyclin E</i>                                      | <i>CycE</i>         | AAGCAGCGATTCAAACGAGGAC/<br>AGGAGGCAACCGATGACAGATTG    |
| <i>division abnormally delayed</i>                   | <i>dally</i>        | TCTACACGACCATCGTGGACAAC/<br>AGGGCACCTCGGGATTATATCG    |
| <i>Death-associated inhibitor of<br/>apoptosis 1</i> | <i>Diap1</i>        | AAGCCCTTCACCGATGTGATGC/<br>TTGAGGACTTGGGTGCGCATTG     |
| <i>E2F transcription factor 1</i>                    | <i>E2f1</i>         | TCAACGACATTGGCTCGGACTAC/<br>GCGGATTGATGGACACAAAGGC    |
| <i>Myc</i>                                           | <i>myc</i>          | ACGGAAACTATGTTCAGCGAGAC/<br>TACGGATCAGAGCGGTAAAGGG    |
| <i>vein</i>                                          | <i>vn</i>           | AGTGCCGGGCCAAGAATAAAGC/<br>TCCGTGGGAAAGTGAAGTGGTG     |
| <i>wingless</i>                                      | <i>wg</i>           | ACCCGATCAGCAAGATCCATCAC/<br>ATCTATTATGCTTGCGTCCCTGAC  |
| <i>yorkie</i>                                        | <i>Yki</i>          | CCCAGAATCCAATATCGCCAGCAG/<br>AGCACGCTAAGCCCAGATTCATTC |
