# Supplementary material for: Studying the Geroprotective Properties of YAP/TAZ Signaling Inhibitors on Drosophila melanogaster Model
Source: Preprints.org preprint supplement (doi:10.20944/preprints202212.0250.v1), 2022-12-14
Supplement: Supplementary file 7 [file supplementary]

**Table S10.** Effects of treatment with YAP/TAZ inhibitors on the lifespan of male and female flies. The results of two independent replicate experiments are presented.

| Inhibitor | Sex | Rep. | C (μM)      | M (days) | dM (%) | FET (M) |        | 90% (days) | d90% (%) | FET (90%) |        | FHT (Early) |        | FHT (Late) |        | N   |
|-----------|-----|------|-------------|----------|--------|---------|--------|------------|----------|-----------|--------|-------------|--------|------------|--------|-----|
|           |     |      |             |          |        | p       | pB     |            |          | p         | pB     | p           | pB     | p          | pB     |     |
| VP        | ♂   | 1    | 0 (control) | 36       | n/a    | n/a     | n/a    | 37         | n/a      | n/a       | n/a    | n/a         | n/a    | n/a        | n/a    | 145 |
|           |     |      | 0.01        | 36       | 0      | 0.2     | 0.4    | 38         | +3       | 1         | 1      | 0.5216      | 1      | 0.2043     | 0.4086 | 141 |
|           |     |      | 0.1         | 36       | 0      | 0.002   | 0.004  | 40         | +8       | 0         | 0      | 0.0009      | 0.0019 | 0          | 0      | 154 |
| VP        | ♂   | 2    | 0 (control) | 36       | n/a    | n/a     | n/a    | 41         | n/a      | n/a       | n/a    | n/a         | n/a    | n/a        | n/a    | 152 |
|           |     |      | 0.01        | 37       | +3     | 0.08    | 0.16   | 42         | +2       | 1         | 1      | 0.0024      | 0.0048 | 0          | 0      | 165 |
|           |     |      | 0.1         | 37       | +3     | 0.05    | 0.1    | 42         | +2       | 0         | 0      | 0.011       | 0.0221 | 0          | 0      | 159 |
| ML        | ♂   | 1    | 0 (control) | 35       | n/a    | n/a     | n/a    | 40         | n/a      | n/a       | n/a    | n/a         | n/a    | n/a        | n/a    | 147 |
|           |     |      | 0.1         | 35       | 0      | 0.9     | 1      | 40         | 0        | 0.7       | 1      | 0.53        | 1      | 0.0722     | 0.1445 | 144 |
|           |     |      | 1           | 36       | +3     | 0.7     | 1      | 40         | 0        | 0.2       | 1      | 0.667       | 1      | 0.1454     | 0.2909 | 153 |
| ML        | ♂   | 2    | 0 (control) | 35       | n/a    | n/a     | n/a    | 40         | n/a      | n/a       | n/a    | n/a         | n/a    | n/a        | n/a    | 153 |
|           |     |      | 0.1         | 36       | +3     | 0.3     | 0.6    | 41         | +3       | 0         | 0      | 0.132       | 0.264  | 0.0135     | 0.027  | 143 |
|           |     |      | 1           | 36       | +3     | 0.4     | 0.8    | 37         | -7       | 1         | 1      | 0.597       | 1      | 0.0021     | 0.0041 | 156 |
| CD        | ♂   | 1    | 0 (control) | 36       | n/a    | n/a     | n/a    | 40         | n/a      | n/a       | n/a    | n/a         | n/a    | n/a        | n/a    | 140 |
|           |     |      | 0.1         | 37       | +3     | 0.003   | 0.006  | 41         | +3       | 0.01      | 0.02   | 0.0003      | 0.0006 | 0.0003     | 0.0006 | 163 |
|           |     |      | 1           | 37       | +3     | 0.022   | 0.044  | 41         | +3       | 0.015     | 0.03   | 0.0643      | 0.1286 | 0.0643     | 0.1286 | 153 |
| CD        | ♂   | 2    | 0 (control) | 36       | n/a    | n/a     | n/a    | 40         | n/a      | n/a       | n/a    | n/a         | n/a    | n/a        | n/a    | 150 |
|           |     |      | 0.1         | 37       | +3     | 0.34    | 0.68   | 41         | +3       | 0.6       | 1      | 0.038       | 0.076  | 0.1021     | 0.2042 | 161 |
|           |     |      | 1           | 37       | +3     | 0.47    | 0.54   | 41         | +3       | 1         | 1      | 0.005       | 0.01   | 0.0003     | 0.0005 | 150 |
| AI        | ♂   | 1    | 0 (control) | 35       | n/a    | n/a     | n/a    | 40         | n/a      | n/a       | n/a    | n/a         | n/a    | n/a        | n/a    | 150 |
|           |     |      | 0.1         | 37       | +6     | 0.015   | 0.03   | 41         | +3       | 0         | 0      | 0           | 0      | 0          | 0      | 174 |
|           |     |      | 1           | 37       | +6     | 0.0002  | 0.0004 | 40         | 0        | 0.0002    | 0.0004 | 0.0008      | 0.0016 | 0.0013     | 0.0025 | 157 |
| AI        | ♂   | 2    | 0 (control) | 40       | n/a    | n/a     | n/a    | 40         | n/a      | n/a       | n/a    | n/a         | n/a    | n/a        | n/a    | 143 |
|           |     |      | 0.1         | 37       | -7     | 0.02    | 0.04   | 41         | +3       | 0.04      | 0.08   | 0.062       | 0.12   | 0.0037     | 0.0073 | 147 |
|           |     |      | 1           | 37       | -7     | 0.005   | 0.01   | 41         | +3       | 0.01      | 0.02   | 0.041       | 0.08   | 0.0001     | 0.0001 | 156 |
| VP        | ♀   | 1    | 0 (control) | 36       | n/a    | n/a     | n/a    | 39         | n/a      | n/a       | n/a    | n/a         | n/a    | n/a        | n/a    | 147 |
|           |     |      | 0.01        | 36       | 0      | 0.09    | 0.18   | 40         | +3       | 0.12      | 0.24   | 0.0354      | 0.0708 | 0.4701     | 0.9402 | 157 |
|           |     |      | 0.1         | 36       | 0      | 0.14    | 0.24   | 40         | +3       | 0.79      | 1      | 0.1807      | 0.3613 | 0.1031     | 0.2062 | 150 |
| VP        | ♀   | 2    | 0 (control) | 36       | n/a    | n/a     | n/a    | 41         | n/a      | n/a       | n/a    | n/a         | n/a    | n/a        | n/a    | 145 |
|           |     |      | 0.01        | 34       | -6     | 0.02    | 0.04   | 41         | 0        | 0.001     | 0.002  | 0.151       | 0.3021 | 0.7784     | 1      | 148 |
|           |     |      | 0.1         | 36       | 0      | 1       | 1      | 42         | +3       | 0         | 0      | 0.6765      | 1      | 0.0079     | 0.0158 | 131 |
| ML        | ♀   | 1    | 0 (control) | 35       | n/a    | n/a     | n/a    | 40         | n/a      | n/a       | n/a    | n/a         | n/a    | n/a        | n/a    | 142 |
|           |     |      | 0.1         | 35       | 0      | 0.5     | 1      | 41         | +3       | 0.2       | 1      | 0.812       | 1      | 0.0095     | 0.0189 | 136 |

|    |   |   |             |    |     |        |        |    |     |        |        |        |        |        |        |     |
|----|---|---|-------------|----|-----|--------|--------|----|-----|--------|--------|--------|--------|--------|--------|-----|
|    |   |   | 1           | 35 | 0   | 0.4    | 1      | 40 | 0   | 0.4    | 1      | 0.803  | 1      | 0.574  | 1      | 140 |
| ML | ♀ | 2 | 0 (control) | 34 | n/a | n/a    | n/a    | 40 | n/a | n/a    | n/a    | n/a    | n/a    | n/a    | n/a    | 158 |
|    |   |   | 0.1         | 34 | 0   | 0.12   | 0.24   | 37 | -7  | 0.004  | 0.008  | 0.17   | 0.34   | 0.809  | 1      | 138 |
|    |   |   | 1           | 35 | +3  | 0.29   | 0.58   | 40 | 0   | 0      | 0      | 0.0704 | 0.14   | 0.0064 | 0.0129 | 143 |
| CD | ♀ | 1 | 0 (control) | 34 | n/a | n/a    | n/a    | 40 | n/a | n/a    | n/a    | n/a    | n/a    | n/a    | n/a    | 149 |
|    |   |   | 0.1         | 33 | -3  | 0.9    | 1      | 40 | 0   | 0.6    | 1      | 0.102  | 0.205  | 0.3496 | 0.6992 | 152 |
|    |   |   | 1           | 33 | -3  | 0.013  | 0.026  | 40 | 0   | 0.001  | 0.002  | 0.0016 | 0.0032 | 0.0121 | 0.0243 | 168 |
| CD | ♀ | 2 | 0 (control) | 35 | n/a | n/a    | n/a    | 40 | n/a | n/a    | n/a    | n/a    | n/a    | n/a    | n/a    | 143 |
|    |   |   | 0.1         | 34 | -3  | 0.006  | 0.012  | 40 | 0   | 0.007  | 0.014  | 0.016  | 0.032  | 0.0004 | 0.0007 | 141 |
|    |   |   | 1           | 36 | +3  | 0.02   | 0.04   | 41 | +3  | 0.04   | 0.08   | 0.045  | 0.096  | 0.2886 | 0.5772 | 162 |
| AI | ♀ | 1 | 0 (control) | 34 | n/a | n/a    | n/a    | 37 | n/a | n/a    | n/a    | n/a    | n/a    | n/a    | n/a    | 163 |
|    |   |   | 0.1         | 34 | 0   | 0.005  | 0.01   | 37 | 0   | 0.35   | 1      | 0.089  | 0.171  | 0.3784 | 0.7569 | 146 |
|    |   |   | 1           | 37 | +9  | 01     | 02     | 40 | +8  | 1      | 1      | 0      | 0      | 0      | 0      | 161 |
| AI | ♀ | 2 | 0 (control) | 35 | n/a | n/a    | n/a    | 40 | n/a | n/a    | n/a    | n/a    | n/a    | n/a    | n/a    | 160 |
|    |   |   | 0.1         | 34 | -3  | 0.431  | 0.862  | 37 | -8  | 1      | 1      | 0.28   | 0.567  | 0.0824 | 0.1647 | 164 |
|    |   |   | 1           | 37 | +6  | 0.0001 | 0.0002 | 40 | 0   | 0.0009 | 0.0018 | 0.0033 | 0.0067 | 0.001  | 0.0021 | 169 |

VP – Verteporfin; ML7 – ML-7 hydrochloride; CD – Cytochalasin D; AI – AICAR; ♂ – male; ♀ – female; Rep. – Replication; C (μM) – Concentration (μM); M (days) – median lifespan; 90% (days) – maximum lifespan (age of 90% mortality); dM, d90% – differences between median and maximum lifespan of the control and experimental flies, respectively; p – p-value; pB – Bonferroni-corrected p-value; FET (M) and FET (90%) – Fisher's Exact Test for median and maximum lifespan, respectively; FHT (Early) and FHT (Late) – Fleming-Harrington test sensitive against early and later differences, respectively; n/a – not applicable; N – number of flies.
