# Supplementary material for: Studying the Geroprotective Properties of YAP/TAZ Signaling Inhibitors on Drosophila melanogaster Model
Source: Preprints.org preprint supplement (doi:10.20944/preprints202212.0250.v1), 2022-12-14
Supplement: Supplementary file 8 [file supplementary]

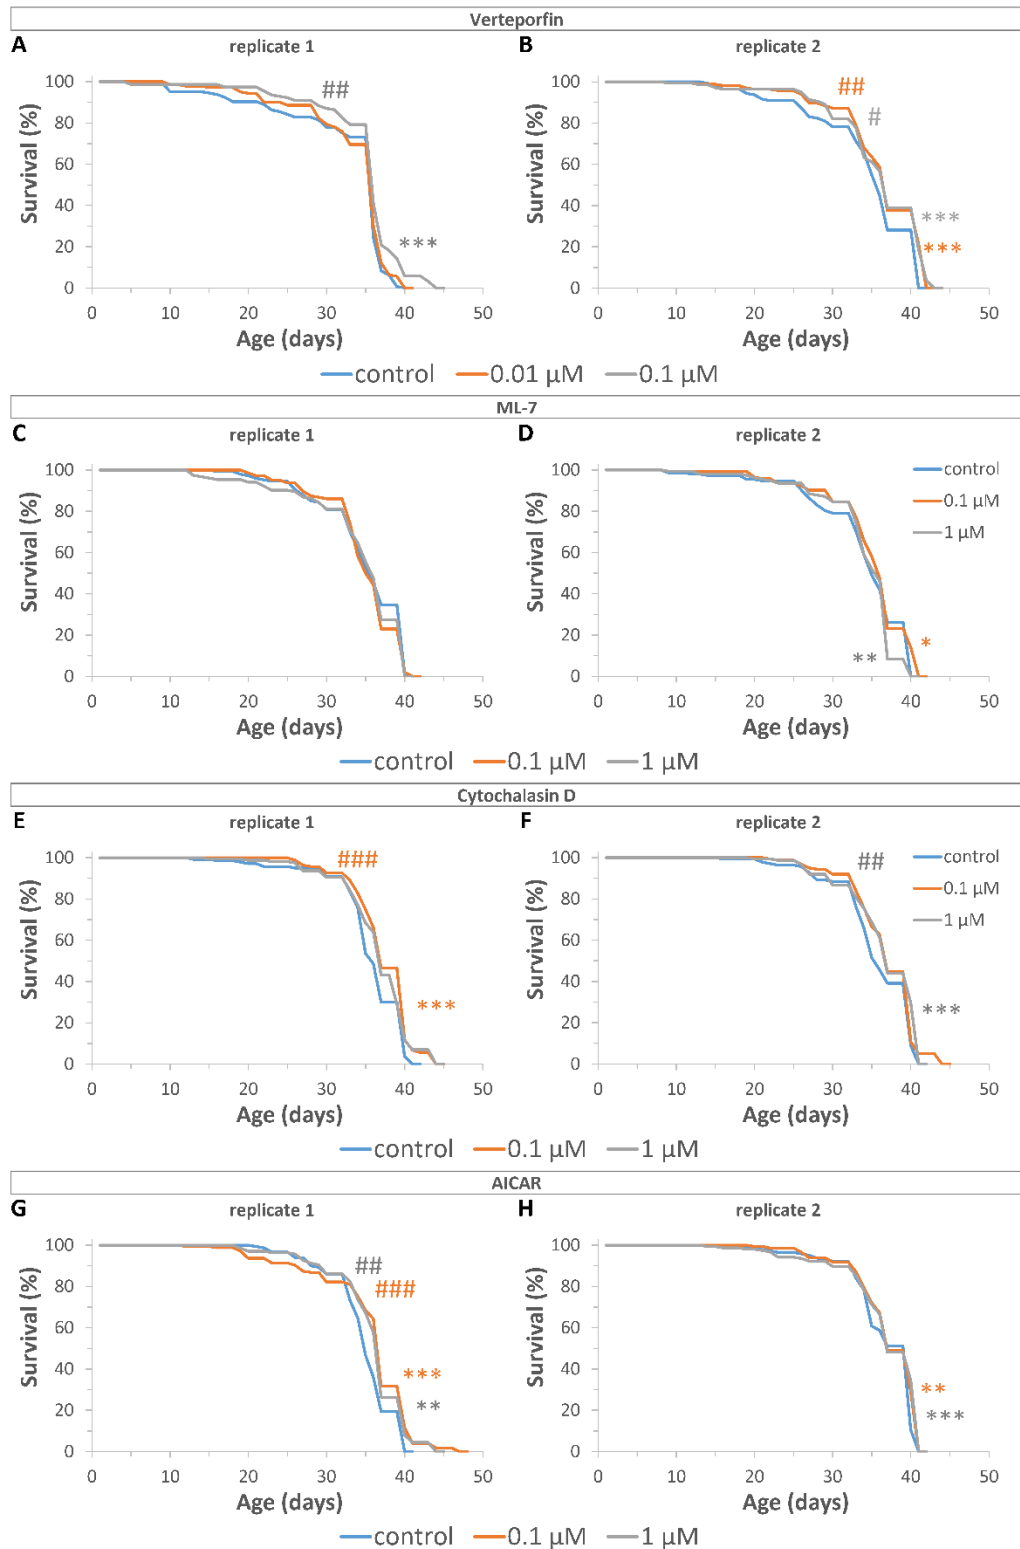

**Figure S2.** Effects of YAP/TAZ inhibitors on the lifespan of males. The results of two independent replicate experiments after treatment with VP (A, B), ML7 (C, D), CD (E, F), AI (G, H) are presented. Fleming-Harrington test sensitive against early ( $\#p < 0.05$ ,  $\#\#p < 0.01$ ,  $\#\#\#p < 0.001$ ) and later ( $*p < 0.05$ ,  $**p < 0.01$ ,  $***p < 0.001$ ) differences was used to compare survival curves of inhibitor-treated and control flies. Bonferroni correction was used for multiple comparisons.
