# Supplementary material for: Studying the Geroprotective Properties of YAP/TAZ Signaling Inhibitors on Drosophila melanogaster Model
Source: Preprints.org preprint supplement (doi:10.20944/preprints202212.0250.v1), 2022-12-14
Supplement: Supplementary file 9 [file supplementary]

**Table S5.** The expression level of Yki target genes in 10 day-old males after treatment with YAP/TAZ inhibitors.

| Gene         | Concentration (μM) | Mean (dCt) | SE   | DT (p)   |
|--------------|--------------------|------------|------|----------|
| Verteporfin  |                    |            |      |          |
| <i>CycE</i>  | 0 (control)        | 10.35      | 0.52 |          |
|              | 0.01               | 8.52       | 0.26 | 0.0168 ↑ |
|              | 0.1                | 9.24       | 0.36 | 0.1458   |
|              | 1                  | 9.38       | 0.29 | 0.1836   |
|              | 10                 | 9.35       | 0.11 | 0.1845   |
| <i>dally</i> | 0 (control)        | 6.73       | 0.84 |          |
|              | 0.01               | 5.43       | 0.13 | 0.1050   |
|              | 0.1                | 6.17       | 0.25 | 0.3989   |
|              | 1                  | 5.84       | 0.30 | 0.2254   |
|              | 10                 | 5.82       | 0.28 | 0.2398   |
| <i>Diap1</i> | 0 (control)        | 2.15       | 0.53 |          |
|              | 0.01               | 2.86       | 0.11 | 0.2878   |
|              | 0.1                | 3.44       | 0.27 | 0.0752   |
|              | 1                  | 3.83       | 0.25 | 0.0215 ↓ |
|              | 10                 | 3.40       | 0.16 | 0.0747   |
| <i>E2f1</i>  | 0 (control)        | 4.89       | 0.40 |          |
|              | 0.01               | 4.07       | 0.13 | 0.2997   |
|              | 0.1                | 4.66       | 0.20 | 0.7210   |
|              | 1                  | 4.47       | 0.13 | 0.5699   |
|              | 10                 | 4.37       | 0.07 | 0.4953   |
| <i>myc</i>   | 0 (control)        | 7.49       | 1.28 |          |
|              | 0.01               | 5.68       | 0.17 | 0.0235 ↑ |
|              | 0.1                | 5.95       | 0.41 | 0.0484 ↑ |
|              | 1                  | 5.75       | 0.13 | 0.0293 ↑ |
|              | 10                 | 5.83       | 0.12 | 0.0351 ↑ |
| <i>vn</i>    | 0 (control)        | 8.93       | 1.07 |          |
|              | 0.01               | 6.76       | 0.17 | 0.0041 ↑ |
|              | 0.1                | 7.39       | 0.31 | 0.0398 ↑ |
|              | 1                  | 7.12       | 0.13 | 0.0161 ↑ |
|              | 10                 | 6.93       | 0.15 | 0.0076 ↑ |
| <i>wg</i>    | 0 (control)        | 6.90       | 1.62 |          |
|              | 0.01               | 8.44       | 0.48 | 0.0409 ↓ |
|              | 0.1                | 8.82       | 0.28 | 0.0110 ↓ |
|              | 1                  | 9.55       | 0.23 | 0.0004 ↓ |
|              | 10                 | 9.69       | 0.31 | 0.0002 ↓ |
| <i>Yki</i>   | 0 (control)        | 5.68       | 0.67 |          |
|              | 0.01               | 4.31       | 0.12 | 0.0847 ↑ |
|              | 0.1                | 4.96       | 0.39 | 0.3304   |
|              | 1                  | 4.55       | 0.23 | 0.1439   |
|              | 10                 | 4.18       | 0.09 | 0.0590 ↑ |
| ML-7         |                    |            |      |          |
| <i>CycE</i>  | 0 (control)        | 12.22      | 0.15 |          |
|              | 0.01               | 13.01      | 0.36 | 0.0353 ↓ |
|              | 0.1                | 12.49      | 0.32 | 0.4322   |
|              | 1                  | 12.81      | 0.37 | 0.1086   |
| <i>dally</i> | 0 (control)        | 7.13       | 0.09 |          |
|              | 0.01               | 7.69       | 0.36 | 0.1570   |
|              | 0.1                | 7.27       | 0.17 | 0.7088   |
|              | 1                  | 7.80       | 0.43 | 0.0931   |
| <i>Diap1</i> | 0 (control)        | 3.47       | 0.24 |          |
|              | 0.01               | 3.84       | 0.39 | 0.2941   |
|              | 0.1                | 3.34       | 0.11 | 0.7042   |

|                |             |       |      |          |
|----------------|-------------|-------|------|----------|
|                | 1           | 3.99  | 0.24 | 0.1612   |
| <i>E2f1</i>    | 0 (control) | 4.47  | 0.14 |          |
|                | 0.01        | 4.64  | 0.18 | 0.6414   |
|                | 0.1         | 4.44  | 0.13 | 0.9429   |
|                | 1           | 4.53  | 0.10 | 0.8509   |
| <i>myc</i>     | 0 (control) | 7.10  | 0.20 |          |
|                | 0.01        | 7.49  | 0.32 | 0.3394   |
|                | 0.1         | 7.64  | 0.28 | 0.1867   |
|                | 1           | 7.12  | 0.18 | 0.9681   |
| <i>vn</i>      | 0 (control) | 7.96  | 0.15 |          |
|                | 0.01        | 8.43  | 0.19 | 0.2304   |
|                | 0.1         | 8.54  | 0.22 | 0.1432   |
|                | 1           | 8.19  | 0.14 | 0.5252   |
| <i>wg</i>      | 0 (control) | 8.36  | 0.28 |          |
|                | 0.01        | 7.98  | 0.43 | 0.3123   |
|                | 0.1         | 9.22  | 0.15 | 0.0206 ↓ |
|                | 1           | 7.24  | 0.25 | 0.0049 ↑ |
| <i>Yki</i>     | 0 (control) | 4.75  | 0.10 |          |
|                | 0.01        | 5.26  | 0.18 | 0.1833   |
|                | 0.1         | 5.00  | 0.10 | 0.4735   |
|                | 1           | 5.12  | 0.11 | 0.3197   |
| Cytochalasin D |             |       |      |          |
| <i>CycE</i>    | 0 (control) | 11.94 | 0.15 |          |
|                | 0.1         | 11.73 | 0.13 | 0.4165   |
|                | 1           | 11.90 | 0.26 | 0.8656   |
| <i>dally</i>   | 0 (control) | 7.48  | 0.09 |          |
|                | 0.1         | 7.13  | 0.12 | 0.1922   |
|                | 1           | 7.35  | 0.03 | 0.5942   |
| <i>Diap1</i>   | 0 (control) | 2.87  | 0.11 |          |
|                | 0.1         | 3.24  | 0.05 | 0.1343   |
|                | 1           | 3.46  | 0.07 | 0.0215 ↓ |
| <i>E2f1</i>    | 0 (control) | 3.71  | 0.08 |          |
|                | 0.1         | 4.19  | 0.13 | 0.0488 ↓ |
|                | 1           | 4.56  | 0.22 | 0.0007 ↓ |
| <i>myc</i>     | 0 (control) | 6.87  | 0.10 |          |
|                | 0.1         | 6.97  | 0.12 | 0.6707   |
|                | 1           | 7.17  | 0.08 | 0.2607   |
| <i>vn</i>      | 0 (control) | 7.69  | 0.12 |          |
|                | 0.1         | 7.85  | 0.07 | 0.5200   |
|                | 1           | 8.11  | 0.09 | 0.1089   |
| <i>wg</i>      | 0 (control) | 8.16  | 0.17 |          |
|                | 0.1         | 8.42  | 0.24 | 0.2737   |
|                | 1           | 8.78  | 0.32 | 0.0145 ↓ |
| <i>Yki</i>     | 0 (control) | 4.60  | 0.13 |          |
|                | 0.1         | 4.58  | 0.08 | 0.9189   |
|                | 1           | 5.20  | 0.47 | 0.0147 ↓ |
| AICAR          |             |       |      |          |
| <i>CycE</i>    | 0 (control) | 11.93 | 0.19 |          |
|                | 0.1         | 11.12 | 0.31 | 0.0176 ↑ |
|                | 1           | 11.68 | 0.18 | 0.4434   |
| <i>dally</i>   | 0 (control) | 7.32  | 0.07 |          |
|                | 0.1         | 7.02  | 0.09 | 0.3967   |
|                | 1           | 7.37  | 0.14 | 0.8627   |
| <i>Diap1</i>   | 0 (control) | 2.92  | 0.04 |          |
|                | 0.1         | 2.76  | 0.06 | 0.6380   |
|                | 1           | 2.88  | 0.11 | 0.8911   |
| <i>E2f1</i>    | 0 (control) | 4.10  | 0.03 |          |
|                | 0.1         | 3.90  | 0.05 | 0.5563   |

|            |             |      |      |          |
|------------|-------------|------|------|----------|
|            | 1           | 4.00 | 0.11 | 0.7535   |
| <i>myc</i> | 0 (control) | 7.27 | 0.11 |          |
|            | 0.1         | 6.65 | 0.12 | 0.0975   |
|            | 1           | 6.93 | 0.11 | 0.3179   |
| <i>vn</i>  | 0 (control) | 8.24 | 0.14 |          |
|            | 0.1         | 7.68 | 0.07 | 0.1032   |
|            | 1           | 7.78 | 0.20 | 0.1555   |
| <i>wg</i>  | 0 (control) | 6.77 | 0.18 |          |
|            | 0.1         | 9.64 | 0.05 | 0.0000 ↓ |
|            | 1           | 6.88 | 0.93 | 0.7520   |
| <i>Yki</i> | 0 (control) | 4.73 | 0.14 |          |
|            | 0.1         | 4.34 | 0.13 | 0.2263   |
|            | 1           | 4.25 | 0.09 | 0.1649   |

dCt – delta Ct (cycle thresholds) values were calculated as the differences in Ct values for target genes and reference genes (*β-Tubulin* and *RpL32*). The Ct values are inversely proportional to the mRNA transcript levels. Higher dCt values represent a lower expression level. SE – standard error of mean, p – p-value. Significance was determined by two-way ANOVA followed by post-hoc Duncan test (DT), ↑ – increase, ↓ – decrease.
