# Supplementary material for: Studying the Geroprotective Properties of YAP/TAZ Signaling Inhibitors on Drosophila melanogaster Model
Source: Preprints.org preprint supplement (doi:10.20944/preprints202212.0250.v1), 2022-12-14
Supplement: Supplementary file 10 [file supplementary]

**Table S2.** Age-related changes in the expression level of Yki target genes.

| Gene         | Sex | Age (days) | Mean (dCt) | Standard Error | p-value |
|--------------|-----|------------|------------|----------------|---------|
| <i>CycE</i>  | ♂   | 10         | 11.6       | 0.2            | 0.0001  |
|              | ♂   | 20         | 12.7       | 0.1            |         |
| <i>dally</i> | ♂   | 10         | 7.2        | 0.2            | 0.0409  |
|              | ♂   | 20         | 7.8        | 0.1            |         |
| <i>Diap1</i> | ♂   | 10         | 2.8        | 0.2            | 0.0316  |
|              | ♂   | 20         | 3.4        | 0.1            |         |
| <i>E2f1</i>  | ♂   | 10         | 4.3        | 0.1            | 0.2499  |
|              | ♂   | 20         | 4.0        | 0.1            |         |
| <i>myc</i>   | ♂   | 10         | 7.2        | 0.3            | 0.2122  |
|              | ♂   | 20         | 6.8        | 0.1            |         |
| <i>vn</i>    | ♂   | 10         | 8.2        | 0.3            | 0.2864  |
|              | ♂   | 20         | 7.9        | 0.1            |         |
| <i>wg</i>    | ♂   | 10         | 7.5        | 0.4            | 0.1902  |
|              | ♂   | 20         | 7.9        | 0.3            |         |
| <i>Yki</i>   | ♂   | 10         | 4.9        | 0.2            | 0.7089  |
|              | ♂   | 20         | 4.8        | 0.1            |         |
| <i>CycE</i>  | ♀   | 10         | 8.7        | 0.2            | 0.0000  |
|              | ♀   | 20         | 10.3       | 0.1            |         |
| <i>dally</i> | ♀   | 10         | 7.8        | 0.1            | 0.0000  |
|              | ♀   | 20         | 8.8        | 0.1            |         |
| <i>Diap1</i> | ♀   | 10         | 4.7        | 0.1            | 0.8341  |
|              | ♀   | 20         | 4.7        | 0.1            |         |
| <i>E2f1</i>  | ♀   | 10         | 5.1        | 0.1            | 0.7278  |
|              | ♀   | 20         | 5.1        | 0.1            |         |
| <i>myc</i>   | ♀   | 10         | 6.2        | 0.1            | 0.0373  |
|              | ♀   | 20         | 6.6        | 0.1            |         |
| <i>vn</i>    | ♀   | 10         | 9.1        | 0.1            | 0.5022  |
|              | ♀   | 20         | 9.2        | 0.1            |         |
| <i>wg</i>    | ♀   | 10         | 9.9        | 0.4            | 0.0013  |
|              | ♀   | 20         | 9.3        | 0.3            |         |
| <i>Yki</i>   | ♀   | 10         | 5.4        | 0.1            | 0.1415  |
|              | ♀   | 20         | 5.1        | 0.1            |         |

♂ – males, ♀ – females; dCt – delta Ct (cycle thresholds) values were calculated as the differences in Ct values for target genes and reference genes (*β-Tubulin* and *RpL32*). The Ct values are inversely proportional to the mRNA transcript levels. Higher dCt values represent a lower expression level. p-value – significance was determined by two-way ANOVA followed by post-hoc Duncan test.
