# Supplementary material for: Studying the Geroprotective Properties of YAP/TAZ Signaling Inhibitors on Drosophila melanogaster Model
Source: Preprints.org preprint supplement (doi:10.20944/preprints202212.0250.v1), 2022-12-14
Supplement: Supplementary file 11 [file supplementary]

**Table S6.** The expression level of Yki target genes in 10 day-old females after treatment with YAP/TAZ inhibitors.

| Gene               | Concentration (μM) | Mean (dCt) | SE   | DT (p)  |
|--------------------|--------------------|------------|------|---------|
| <b>Verteporfin</b> |                    |            |      |         |
| <i>CycE</i>        | 0 (control)        | 7.50       | 0.10 |         |
|                    | 0.01               | 7.97       | 0.06 | 0.0408↓ |
|                    | 0.1                | 7.71       | 0.07 | 0.3040  |
|                    | 1                  | 7.72       | 0.09 | 0.3107  |
|                    | 10                 | 7.73       | 0.15 | 0.3204  |
| <i>dally</i>       | 0 (control)        | 7.03       | 0.04 |         |
|                    | 0.01               | 7.11       | 0.35 | 0.7269  |
|                    | 0.1                | 7.20       | 0.26 | 0.4485  |
|                    | 1                  | 7.26       | 0.11 | 0.3298  |
|                    | 10                 | 6.74       | 0.12 | 0.1627  |
| <i>Diap1</i>       | 0 (control)        | 4.88       | 0.04 |         |
|                    | 0.01               | 4.63       | 0.09 | 0.2774  |
|                    | 0.1                | 4.82       | 0.07 | 0.7818  |
|                    | 1                  | 5.24       | 0.19 | 0.1175  |
|                    | 10                 | 4.63       | 0.11 | 0.2824  |
| <i>E2f1</i>        | 0 (control)        | 5.72       | 0.09 |         |
|                    | 0.01               | 5.86       | 0.22 | 0.5748  |
|                    | 0.1                | 5.75       | 0.18 | 0.9077  |
|                    | 1                  | 5.80       | 0.12 | 0.7472  |
|                    | 10                 | 5.53       | 0.14 | 0.4024  |
| <i>myc</i>         | 0 (control)        | 5.70       | 0.13 |         |
|                    | 0.01               | 5.46       | 0.07 | 0.3210  |
|                    | 0.1                | 5.26       | 0.04 | 0.0669  |
|                    | 1                  | 6.17       | 0.16 | 0.0529  |
|                    | 10                 | 5.48       | 0.12 | 0.3531  |
| <i>vn</i>          | 0 (control)        | 8.81       | 0.17 |         |
|                    | 0.01               | 8.65       | 0.06 | 0.4607  |
|                    | 0.1                | 8.85       | 0.06 | 0.8419  |
|                    | 1                  | 9.40       | 0.24 | 0.0060↓ |
|                    | 10                 | 8.30       | 0.09 | 0.0207↑ |
| <i>wg</i>          | 0 (control)        | 12.52      | 0.22 |         |
|                    | 0.01               | 12.52      | 0.10 | 0.9954  |
|                    | 0.1                | 12.65      | 0.16 | 0.5672  |
|                    | 1                  | 12.05      | 0.23 | 0.0251↑ |
|                    | 10                 | 12.05      | 0.25 | 0.0304↑ |
| <i>Yki</i>         | 0 (control)        | 5.55       | 0.10 |         |
|                    | 0.01               | 5.28       | 0.12 | 0.2627  |
|                    | 0.1                | 5.14       | 0.06 | 0.0957  |
|                    | 1                  | 5.77       | 0.14 | 0.3507  |
|                    | 10                 | 4.96       | 0.12 | 0.0140↑ |
| <b>ML-7</b>        |                    |            |      |         |
| <i>CycE</i>        | 0 (control)        | 8.70       | 0.28 |         |
|                    | 0.01               | 7.40       | 0.15 | 0.0052↑ |

|                |             |       |      |         |
|----------------|-------------|-------|------|---------|
|                | 0.1         | 8.71  | 0.38 | 0.9866  |
|                | 1           | 8.16  | 0.26 | 0.2399  |
| <i>dally</i>   | 0 (control) | 7.86  | 0.11 |         |
|                | 0.01        | 8.05  | 0.41 | 0.6666  |
|                | 0.1         | 7.97  | 0.26 | 0.7881  |
|                | 1           | 8.80  | 0.28 | 0.0541  |
|                |             |       |      |         |
| <i>Diap1</i>   | 0 (control) | 4.90  | 0.37 |         |
|                | 0.01        | 4.89  | 0.31 | 0.9880  |
|                | 0.1         | 4.41  | 0.14 | 0.2703  |
|                | 1           | 5.48  | 0.29 | 0.2219  |
| <i>E2f1</i>    | 0 (control) | 5.34  | 0.13 |         |
|                | 0.01        | 5.39  | 0.21 | 0.9180  |
|                | 0.1         | 5.69  | 0.27 | 0.4903  |
|                | 1           | 5.55  | 0.14 | 0.6708  |
| <i>myc</i>     | 0 (control) | 6.90  | 0.27 |         |
|                | 0.01        | 6.17  | 0.14 | 0.0980  |
|                | 0.1         | 7.05  | 0.44 | 0.7110  |
|                | 1           | 6.59  | 0.20 | 0.4521  |
| <i>vn</i>      | 0 (control) | 9.53  | 0.22 |         |
|                | 0.01        | 9.21  | 0.26 | 0.4765  |
|                | 0.1         | 9.10  | 0.13 | 0.3517  |
|                | 1           | 8.93  | 0.15 | 0.2065  |
| <i>wg</i>      | 0 (control) | 8.53  | 0.74 |         |
|                | 0.01        | 8.47  | 0.57 | 0.8777  |
|                | 0.1         | 9.26  | 0.38 | 0.1388  |
|                | 1           | 10.10 | 0.19 | 0.0007↓ |
| <i>Yki</i>     | 0 (control) | 5.61  | 0.16 |         |
|                | 0.01        | 5.50  | 0.10 | 0.8143  |
|                | 0.1         | 5.26  | 0.21 | 0.4959  |
|                | 1           | 5.59  | 0.12 | 0.9623  |
| Cytochalasin D |             |       |      |         |
| <i>CycE</i>    | 0 (control) | 9.57  | 0.16 |         |
|                | 0.1         | 8.88  | 0.22 | 0.0047↑ |
|                | 1           | 9.18  | 0.25 | 0.0794  |
| <i>dally</i>   | 0 (control) | 8.31  | 0.12 |         |
|                | 0.1         | 7.71  | 0.17 | 0.0095  |
|                | 1           | 8.07  | 0.28 | 0.2676  |
| <i>Diap1</i>   | 0 (control) | 4.86  | 0.04 |         |
|                | 0.1         | 4.52  | 0.03 | 0.2021  |
|                | 1           | 4.59  | 0.11 | 0.3039  |
| <i>E2f1</i>    | 0 (control) | 4.84  | 0.08 |         |
|                | 0.1         | 4.78  | 0.07 | 0.7948  |
|                | 1           | 4.65  | 0.09 | 0.4453  |
| <i>myc</i>     | 0 (control) | 6.38  | 0.05 |         |
|                | 0.1         | 5.87  | 0.10 | 0.0293↑ |
|                | 1           | 6.17  | 0.19 | 0.3402  |
| <i>vn</i>      | 0 (control) | 9.03  | 0.06 |         |
|                | 0.1         | 8.93  | 0.07 | 0.6429  |

|              |             |       |      |         |
|--------------|-------------|-------|------|---------|
|              | 1           | 9.05  | 0.20 | 0.9327  |
| <i>wg</i>    | 0 (control) | 9.69  | 0.29 |         |
|              | 0.1         | 10.14 | 0.34 | 0.0467↓ |
|              | 1           | 10.31 | 0.09 | 0.0074↓ |
| <i>Yki</i>   | 0 (control) | 5.04  | 0.05 |         |
|              | 0.1         | 4.86  | 0.05 | 0.4339  |
|              | 1           | 4.80  | 0.12 | 0.3543  |
| AICAR        |             |       |      |         |
| <i>CycE</i>  | 0 (control) | 9.23  | 0.08 |         |
|              | 0.1         | 8.74  | 0.29 | 0.1172  |
|              | 1           | 9.25  | 0.11 | 0.9329  |
| <i>dally</i> | 0 (control) | 8.00  | 0.07 |         |
|              | 0.1         | 8.08  | 0.13 | 0.7739  |
|              | 1           | 8.41  | 0.06 | 0.1557  |
| <i>Diap1</i> | 0 (control) | 4.28  | 0.06 |         |
|              | 0.1         | 4.09  | 0.09 | 0.5081  |
|              | 1           | 4.34  | 0.09 | 0.8251  |
| <i>E2f1</i>  | 0 (control) | 4.67  | 0.07 |         |
|              | 0.1         | 4.09  | 0.08 | 0.0664  |
|              | 1           | 4.38  | 0.08 | 0.2921  |
| <i>myc</i>   | 0 (control) | 5.80  | 0.09 |         |
|              | 0.1         | 5.37  | 0.10 | 0.1534  |
|              | 1           | 5.76  | 0.04 | 0.8911  |
| <i>vn</i>    | 0 (control) | 8.95  | 0.04 |         |
|              | 0.1         | 8.88  | 0.11 | 0.8045  |
|              | 1           | 9.28  | 0.09 | 0.2980  |
| <i>wg</i>    | 0 (control) | 9.01  | 0.57 |         |
|              | 0.1         | 9.85  | 0.27 | 0.0050↓ |
|              | 1           | 8.58  | 0.52 | 0.1701  |
| <i>Yki</i>   | 0 (control) | 5.47  | 0.06 |         |
|              | 0.1         | 4.83  | 0.11 | 0.0262↑ |
|              | 1           | 4.79  | 0.15 | 0.0230↑ |

dCt – delta Ct (cycle thresholds) values were calculated as the differences in Ct values for target genes and reference genes (*β-Tubulin* and *RpL32*). The Ct values are inversely proportional to the mRNA transcript levels. Higher dCt values represent a lower expression level. SE – standard error of mean, p – p-value. Significance was determined by two-way ANOVA followed by post-hoc Duncan test (DT), ↑ – increase, ↓ – decrease.
