# Supplementary material for: Studying the Geroprotective Properties of YAP/TAZ Signaling Inhibitors on Drosophila melanogaster Model
Source: Preprints.org preprint supplement (doi:10.20944/preprints202212.0250.v1), 2022-12-14
Supplement: Supplementary file 12 [file supplementary]

Archive with 14 entries (14 files):
- Figure S1.pdf
- Figure S2.pdf
- Figure S3.pdf
- Table S1.pdf
- Table S10.pdf
- Table S11.pdf
- Table S2.pdf
- Table S3.pdf
- Table S4.pdf
- Table S5.pdf
- Table S6.pdf
- Table S7.pdf
- Table S8.pdf
- Table S9.pdf
