# Supplementary material for: Studying the Geroprotective Properties of YAP/TAZ Signaling Inhibitors on Drosophila melanogaster Model
Source: Preprints.org preprint supplement (doi:10.20944/preprints202212.0250.v1), 2022-12-14
Supplement: Supplementary file 12 [file supplementary › Table S4.pdf]

**Table S4.** Two-way ANOVA of the effect of Yap/Taz inhibitors on the expression level of Yki target genes in 10-day-old male and female flies.

| Substance | Sex | Source of variation  | SS       | DF  | MS      | F       | p        |
|-----------|-----|----------------------|----------|-----|---------|---------|----------|
| VP        | ♂   | Gene                 | 1446.39  | 7   | 206.63  | 105.601 | 0.000000 |
|           |     | Concentration        | 29.01    | 4   | 7.25    | 3.706   | 0.005773 |
|           |     | Gene × Concentration | 118.59   | 28  | 4.24    | 2.164   | 0.000798 |
|           |     | Error                | 620.27   | 317 | 1.96    |         |          |
| ML7       | ♂   | Gene                 | 2067.13  | 7   | 295.30  | 553.90  | 0.000000 |
|           |     | Concentration        | 5.52     | 3   | 1.84    | 3.45    | 0.017177 |
|           |     | Gene × Concentration | 26.44    | 21  | 1.26    | 2.36    | 0.000954 |
|           |     | Error                | 134.88   | 253 | 0.53    |         |          |
| CD        | ♂   | Gene                 | 1437.930 | 7   | 205.419 | 771.26  | 0.000000 |
|           |     | Concentration        | 6.213    | 2   | 3.106   | 11.66   | 0.000017 |
|           |     | Gene × Concentration | 4.579    | 14  | 0.327   | 1.23    | 0.257662 |
|           |     | Error                | 50.605   | 190 | 0.266   |         |          |
| AI        | ♂   | Gene                 | 1451.440 | 7   | 207.349 | 433.02  | 0.000000 |
|           |     | Concentration        | 1.564    | 2   | 0.782   | 1.63    | 0.197951 |
|           |     | Gene × Concentration | 54.479   | 14  | 3.891   | 8.13    | 0.000000 |
|           |     | Error                | 91.937   | 192 | 0.479   |         |          |
| VP        | ♀   | Gene                 | 1913.58  | 7   | 273.37  | 1398.06 | 0.000000 |
|           |     | Concentration        | 9.00     | 4   | 2.25    | 11.51   | 0.000000 |
|           |     | Gene × Concentration | 12.73    | 28  | 0.45    | 2.33    | 0.000253 |
|           |     | Error                | 62.18    | 318 | 0.20    |         |          |
| ML7       | ♀   | Gene                 | 743.67   | 7   | 106.24  | 139.15  | 0.000000 |
|           |     | Concentration        | 9.41     | 3   | 3.14    | 4.11    | 0.007175 |
|           |     | Gene × Concentration | 33.31    | 21  | 1.59    | 2.08    | 0.004550 |
|           |     | Error                | 192.40   | 252 | 0.76    |         |          |
| CD        | ♀   | Gene                 | 927.41   | 7   | 132.49  | 604.43  | 0.000000 |
|           |     | Concentration        | 2.29     | 2   | 1.14    | 5.22    | 0.006225 |
|           |     | Gene × Concentration | 5.50     | 14  | 0.39    | 1.79    | 0.042299 |
|           |     | Error                | 41.21    | 188 | 0.22    |         |          |
| AI        | ♀   | Gene                 | 922.43   | 7   | 131.78  | 385.59  | 0.000000 |
|           |     | Concentration        | 1.24     | 2   | 0.62    | 1.81    | 0.166154 |
|           |     | Gene × Concentration | 14.95    | 14  | 1.07    | 3.13    | 0.000205 |
|           |     | Error                | 65.27    | 191 | 0.34    |         |          |

VP – Verteporfin; ML7 – ML-7 hydrochloride; CD – Cytochalasin D; AI – AICAR; ♂ – male; ♀ – female; SS – sum-of-squares; DF – degrees of freedom; MS – mean squares. Results of F-tests: F – F-value and p – p-value.
