# Supplementary material for: Studying the Geroprotective Properties of YAP/TAZ Signaling Inhibitors on Drosophila melanogaster Model
Source: Preprints.org preprint supplement (doi:10.20944/preprints202212.0250.v1), 2022-12-14
Supplement: Supplementary file 12 [file supplementary › Table S9.pdf]

**Table S9.** The expression level of Yki target genes in 20-day-old females after treatment with YAP/TAZ inhibitors.

| Gene               | Concentration (μM) | Mean (dCt) | SE   | DT (p)  |
|--------------------|--------------------|------------|------|---------|
| <b>Verteporfin</b> |                    |            |      |         |
| <i>CycE</i>        | 0 (control)        | 10.71      | 0.14 |         |
|                    | 0.01               | 10.79      | 0.23 | 0.8265  |
|                    | 0.1                | 11.31      | 0.32 | 0.1528  |
|                    | 1                  | 11.59      | 0.19 | 0.0366↓ |
|                    | 10                 | 11.20      | 0.20 | 0.2333  |
| <i>dally</i>       | 0 (control)        | 8.93       | 0.11 |         |
|                    | 0.01               | 9.48       | 0.14 | 0.2007  |
|                    | 0.1                | 9.79       | 0.36 | 0.0504↓ |
|                    | 1                  | 10.10      | 0.21 | 0.0061↓ |
|                    | 10                 | 9.56       | 0.16 | 0.1490  |
| <i>Diap1</i>       | 0 (control)        | 4.59       | 0.21 |         |
|                    | 0.01               | 4.24       | 0.06 | 0.4294  |
|                    | 0.1                | 4.53       | 0.38 | 0.8825  |
|                    | 1                  | 5.04       | 0.25 | 0.3117  |
|                    | 10                 | 4.66       | 0.11 | 0.8599  |
| <i>E2f1</i>        | 0 (control)        | 4.57       | 0.19 |         |
|                    | 0.01               | 5.06       | 0.21 | 0.2824  |
|                    | 0.1                | 4.34       | 0.37 | 0.5712  |
|                    | 1                  | 5.02       | 0.26 | 0.3117  |
|                    | 10                 | 4.89       | 0.08 | 0.4705  |
| <i>myc</i>         | 0 (control)        | 6.89       | 0.20 |         |
|                    | 0.01               | 6.86       | 0.10 | 0.9483  |
|                    | 0.1                | 6.07       | 0.12 | 0.0376  |
|                    | 1                  | 7.00       | 0.12 | 0.7618  |
|                    | 10                 | 7.11       | 0.24 | 0.5793  |
| <i>vn</i>          | 0 (control)        | 8.72       | 0.10 |         |
|                    | 0.01               | 8.78       | 0.12 | 0.8887  |
|                    | 0.1                | 8.77       | 0.12 | 0.9035  |
|                    | 1                  | 9.35       | 0.21 | 0.1483  |
|                    | 10                 | 9.09       | 0.09 | 0.3886  |
| <i>wg</i>          | 0 (control)        | 9.58       | 0.41 |         |
|                    | 0.01               | 9.27       | 0.53 | 0.4832  |
|                    | 0.1                | 9.43       | 0.74 | 0.7226  |
|                    | 1                  | 10.99      | 0.69 | 0.0004↓ |
|                    | 10                 | 8.70       | 0.18 | 0.0495↑ |
| <i>Yki</i>         | 0 (control)        | 4.66       | 0.14 |         |
|                    | 0.01               | 4.78       | 0.07 | 0.7383  |
|                    | 0.1                | 4.24       | 0.16 | 0.3512  |
|                    | 1                  | 4.99       | 0.10 | 0.4294  |
|                    | 10                 | 4.64       | 0.15 | 0.9677  |
| <b>ML-7</b>        |                    |            |      |         |
| <i>CycE</i>        | 0 (control)        | 10.56      | 0.36 |         |
|                    | 0.01               | 9.60       | 0.33 | 0.0536  |
|                    | 0.1                | 10.46      | 0.42 | 0.8189  |
|                    | 1                  | 10.11      | 0.27 | 0.3355  |
| <i>dally</i>       | 0 (control)        | 8.48       | 0.19 |         |
|                    | 0.01               | 8.35       | 0.31 | 0.7897  |
|                    | 0.1                | 8.61       | 0.28 | 0.7623  |
|                    | 1                  | 9.19       | 0.41 | 0.1413  |
| <i>Diap1</i>       | 0 (control)        | 4.66       | 0.20 |         |
|                    | 0.01               | 3.98       | 0.30 | 0.1415  |
|                    | 0.1                | 4.16       | 0.05 | 0.2516  |
|                    | 1                  | 4.68       | 0.16 | 0.9701  |

|                |             |       |      |         |
|----------------|-------------|-------|------|---------|
| <i>E2f1</i>    | 0 (control) | 5.37  | 0.14 |         |
|                | 0.01        | 5.12  | 0.16 | 0.6055  |
|                | 0.1         | 4.91  | 0.06 | 0.3794  |
|                | 1           | 5.20  | 0.17 | 0.7243  |
| <i>myc</i>     | 0 (control) | 6.39  | 0.15 |         |
|                | 0.01        | 6.16  | 0.44 | 0.6179  |
|                | 0.1         | 6.39  | 0.09 | 0.9943  |
|                | 1           | 7.08  | 0.23 | 0.1140  |
| <i>vn</i>      | 0 (control) | 9.83  | 0.08 |         |
|                | 0.01        | 9.78  | 0.27 | 0.9103  |
|                | 0.1         | 9.11  | 0.18 | 0.1554  |
|                | 1           | 9.47  | 0.21 | 0.4609  |
| <i>wg</i>      | 0 (control) | 7.26  | 0.50 |         |
|                | 0.01        | 7.39  | 0.83 | 0.7567  |
|                | 0.1         | 8.05  | 0.56 | 0.0847  |
|                | 1           | 8.37  | 0.40 | 0.0208↓ |
| <i>Yki</i>     | 0 (control) | 5.36  | 0.19 |         |
|                | 0.01        | 5.04  | 0.24 | 0.5258  |
|                | 0.1         | 4.83  | 0.06 | 0.3064  |
|                | 1           | 5.05  | 0.11 | 0.5293  |
| Cytochalasin D |             |       |      |         |
| <i>CycE</i>    | 0 (control) | 10.50 | 0.15 |         |
|                | 0.1         | 11.66 | 0.28 | 0.0024↓ |
|                | 1           | 10.70 | 0.16 | 0.5953  |
| <i>dally</i>   | 0 (control) | 9.32  | 0.19 |         |
|                | 0.1         | 9.57  | 0.11 | 0.5406  |
|                | 1           | 9.61  | 0.32 | 0.4958  |
| <i>Diap1</i>   | 0 (control) | 4.89  | 0.26 |         |
|                | 0.1         | 4.89  | 0.13 | 0.9963  |
|                | 1           | 4.64  | 0.16 | 0.4962  |
| <i>E2f1</i>    | 0 (control) | 5.11  | 0.23 |         |
|                | 0.1         | 5.03  | 0.29 | 0.8377  |
|                | 1           | 5.30  | 0.26 | 0.6415  |
| <i>myc</i>     | 0 (control) | 6.70  | 0.12 |         |
|                | 0.1         | 6.86  | 0.13 | 0.6683  |
|                | 1           | 7.02  | 0.22 | 0.4288  |
| <i>vn</i>      | 0 (control) | 9.07  | 0.15 |         |
|                | 0.1         | 9.63  | 0.24 | 0.2045  |
|                | 1           | 9.37  | 0.21 | 0.4746  |
| <i>wg</i>      | 0 (control) | 9.40  | 0.63 |         |
|                | 0.1         | 10.20 | 0.39 | 0.0499↓ |
|                | 1           | 9.25  | 0.42 | 0.7288  |
| <i>Yki</i>     | 0 (control) | 5.11  | 0.12 |         |
|                | 0.1         | 5.21  | 0.17 | 0.7917  |
|                | 1           | 5.11  | 0.20 | 0.9873  |
| AICAR          |             |       |      |         |
| <i>CycE</i>    | 0 (control) | 9.58  | 0.23 |         |
|                | 0.1         | 8.99  | 0.16 | 0.1699  |
|                | 1           | 9.44  | 0.17 | 0.7290  |
| <i>dally</i>   | 0 (control) | 8.65  | 0.10 |         |
|                | 0.1         | 8.45  | 0.12 | 0.5807  |
|                | 1           | 8.18  | 0.49 | 0.2364  |
| <i>Diap1</i>   | 0 (control) | 4.60  | 0.04 |         |
|                | 0.1         | 4.29  | 0.03 | 0.4443  |
|                | 1           | 4.34  | 0.05 | 0.4829  |
| <i>E2f1</i>    | 0 (control) | 5.23  | 0.05 |         |
|                | 0.1         | 4.82  | 0.07 | 0.3406  |
|                | 1           | 4.81  | 0.16 | 0.3341  |

|            |             |       |      |         |
|------------|-------------|-------|------|---------|
| <i>myc</i> | 0 (control) | 6.54  | 0.08 |         |
|            | 0.1         | 5.99  | 0.12 | 0.1573  |
|            | 1           | 6.38  | 0.36 | 0.6680  |
| <i>vn</i>  | 0 (control) | 9.26  | 0.04 |         |
|            | 0.1         | 9.10  | 0.21 | 0.6763  |
|            | 1           | 9.52  | 0.23 | 0.5079  |
| <i>wg</i>  | 0 (control) | 10.80 | 0.14 |         |
|            | 0.1         | 9.87  | 0.51 | 0.0158↑ |
|            | 1           | 10.09 | 0.82 | 0.0544  |
| <i>Yki</i> | 0 (control) | 5.21  | 0.06 |         |
|            | 0.1         | 4.90  | 0.07 | 0.3926  |
|            | 1           | 4.84  | 0.14 | 0.3439  |

dCt – delta Ct (cycle thresholds) values were calculated as the differences in Ct values for target genes and reference genes (*β-Tubulin* and *RpL32*). The Ct values are inversely proportional to the mRNA transcript levels. Higher dCt values represent a lower expression level. SE – standard error of mean, p – p-value. Significance was determined by two-way ANOVA followed by post-hoc Duncan test (DT).
